# Supplementary material for: SnO2 nanosheets grown on graphene sheets with enhanced lithium storage properties
Source: Royal Society of Chemistry journal article supplement (doi:10.1039/c1cc11968k), 2011-01-01
Supplement: c1cc11968k.pdf [file c1cc11968k.pdf]

Electronic Supplementary Information for

---

## **SnO<sub>2</sub> nanosheets grown on graphene sheets with enhanced lithium storage properties**

Shujiang Ding, Deyan Luan, Freddy Yin Chiang Boey, Jun Song Chen,  
and Xiong Wen (David) Lou\*

*School of Chemical and Biomedical Engineering, Nanyang Technological University, 70 Nanyang Drive, Singapore 637457, School of Materials Science and Engineering, Nanyang Technological University, 50 Nanyang Avenue, 639798 (Singapore), Energy Research Institute @ NTU, Nanyang Technological University, 50 Nanyang Drive, Singapore 637553 (Singapore) Email: [xwlou@ntu.edu.sg](mailto:xwlou@ntu.edu.sg)*

### **Experimental section**

#### **Materials Preparation**

The graphene oxide (GO) sheets were first synthesized by a modified Hummers' method.<sup>1-2</sup> In a typical synthesis of G-SnO<sub>2</sub> NSs, 3 mg of GO sheets was dispersed into 40 mL of 10 mM mercapto acetic acid solution by ultrasonication for 30 minutes. 0.3 mL of HCl solution (37 wt%, Sigma-Aldrich) was added to mercapto acetic acid solution. After stirring for 10 minutes, 100 mg of tin(II) chloride dihydrate (SnCl<sub>2</sub>·2H<sub>2</sub>O; 99%, Sigma-Aldrich) and 0.5 g of urea were added. After stirring for 5 minutes, the reaction solution was then transferred to a 60 mL Teflon-lined stainless steel autoclave and kept in an electric oven at 120 °C for 6 h. The autoclave was then taken out from the oven and left to cool down to room temperature. The black precipitate was collected by centrifugation, washed thoroughly with ethanol, and dried at 80 °C for 12 h. The as-prepared GO-SnO<sub>2</sub> NSs were further treated at 400 °C in the atmosphere of 5% H<sub>2</sub> balanced by N<sub>2</sub> for 2 h with a heating rate of 1 °C min<sup>-1</sup> to obtain the G-SnO<sub>2</sub> NSs.

#### **Material Characterizations**

The product morphology was examined using field-emission scanning electron microscopy (FESEM; JEOL, JSM-6700F, 5 kV) and transmission electron microscopy

(TEM; JEOL, JEM-2100F, 200 kV). Crystallographic information for the samples was collected using powder X-ray diffraction (XRD; Bruker, D8 Advance X-ray diffractometer, Cu  $K\alpha$  radiation,  $\lambda = 1.5406 \text{ \AA}$ ). The nitrogen adsorption was performed using a Quantachrome Instrument (Autosorb AS-6B). Thermogravimetric analysis (TGA) was carried out under a flow of air with a temperature ramp of  $5 \text{ }^\circ\text{C min}^{-1}$ .

### Electrochemical Measurements

The electrochemical measurements were carried out using two-electrode Swagelok cells (X2 Labwares, Singapore) with pure lithium metal as both the counter and the reference electrodes at room temperature. The working electrode consisted of active material (e.g., G@SnO<sub>2</sub> NSs), a conductive agent (carbon black, Super-P-Li), and a polymer binder (poly(vinylidene difluoride), PVDF, Aldrich) in a 70:20:10 weight ratio. The electrolyte used was 1.0 M LiPF<sub>6</sub> in a 50:50 (w/w) mixture of ethylene carbonate and diethyl carbonate. Cell assembly was carried out in an Ar-filled glovebox with concentrations of moisture and oxygen below 1.0 ppm. Cyclic voltammetry (0.005–2.5 V,  $0.5 \text{ mV s}^{-1}$ ) was performed using an electrochemical workstation (CHI 660C). The charge/discharge tests were performed using a NEWARE battery tester at different current rates with a voltage window of 0.01–1.2 V.

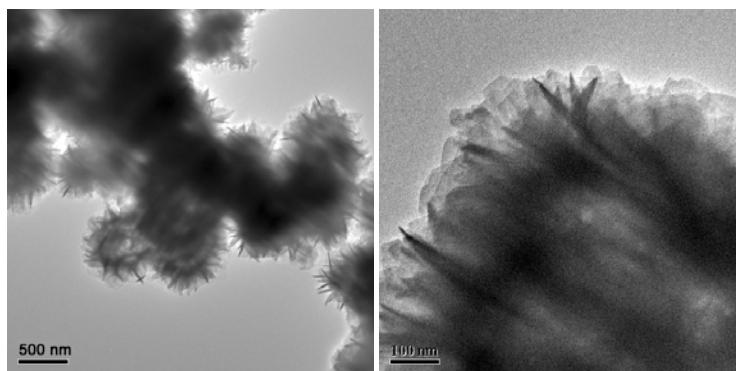

**Figure S1.** TEM images of SnO<sub>2</sub> nanosheets synthesized without the addition of GO.

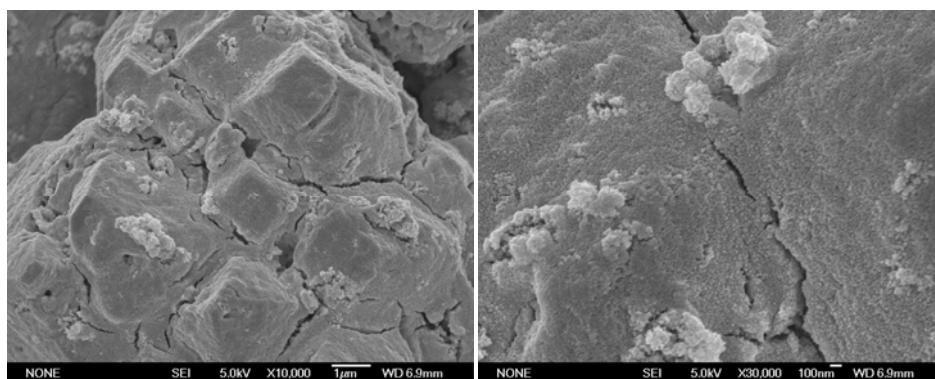

**Figure S2.** SEM images of SnO<sub>2</sub> nanoparticles synthesized without the addition of GO and mercapto acetic acid.

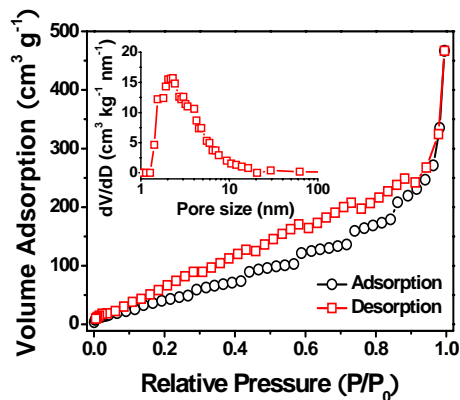

**Figure S3.** N<sub>2</sub> adsorption-desorption isotherm of G-SnO<sub>2</sub> NSs. The inset shows the pore size distribution calculated from the desorption branch.

## Reference

- (1) Hummers, W. S.; Offeman, R. E., *J. Am. Chem. Soc.* **1958**, *80*, 1339-1339.
- (2) Liang, Y. Y.; Wang, H. L.; Casalongue, H. S.; Chen, Z.; Dai, H. J., *Nano Res.* **2010**, *3*, 701-705.
